# Supplementary material for: Survival Benefits From Surgery for Stage IVa Head and Neck Squamous Cell Carcinoma: A Multi-institutional Analysis of 1,033 Cases
Source: PubMed Central journal article supplement — Clin Exp Otorhinolaryngol. 2020 Sep 25;14(2):225–34. doi: 10.21053/ceo.2020.01732 (PMC8111393; doi:10.21053/ceo.2020.01732), 2020-09-25
Supplement: ceo-2020-01732-suppl1.pdf [file ceo-2020-01732-suppl1.pdf]

**Supplementary Table 1.** Univariate analyses by log-rank test of the clinical parameters predicting the prognosis of patients with stage IVa head and neck squamous cell carcinoma (n=1,033)

| Variable           | Number of patients | 5-Year OS (%) | P-value | 5-Year DFS (%) | P-value |
|--------------------|--------------------|---------------|---------|----------------|---------|
| Age (yr)           |                    |               | <0.001* |                | 0.008*  |
| ≥60                | 431                | 68.0          |         | 63.9           |         |
| <60                | 602                | 55.0          |         | 53.8           |         |
| Sex                |                    |               | 0.818   |                | 0.510   |
| Male               | 859                | 60.4          |         | 58.4           |         |
| Female             | 174                | 61.6          |         | 57.6           |         |
| Primary tumor      |                    |               | <0.001* |                | <0.001* |
| Oral               | 329                | 59.1          |         | 51.5           |         |
| Oropharynx         | 301                | 69.7          |         | 67.1           |         |
| Larynx             | 165                | 64.8          |         | 61.9           |         |
| Hypopharynx        | 238                | 48.9          |         | 52.9           |         |
| T stage            |                    |               | <0.049* |                | <0.001* |
| Non-T4a            | 582                | 63.9          |         | 62.9           |         |
| T4a                | 451                | 55.8          |         | 51.7           |         |
| N stage            |                    |               | 0.313   |                | 0.853   |
| N0, 1              | 201                | 62.9          |         | 59.2           |         |
| N2                 | 832                | 60.1          |         | 58.0           |         |
| Treatment modality |                    |               | 0.012*  |                | <0.001* |
| Surgery (+)        | 765                | 64.4          |         | 62.0           |         |
| Surgery (-)        | 268                | 49.5          |         | 45.4           |         |

OS, overall survival; DFS, disease-free survival.

\*Statistically significant ( $P < 0.05$ ).
