# Supplementary material for: Survival Benefits From Surgery for Stage IVa Head and Neck Squamous Cell Carcinoma: A Multi-institutional Analysis of 1,033 Cases
Source: PubMed Central journal article supplement — Clin Exp Otorhinolaryngol. 2020 Sep 25;14(2):225–34. doi: 10.21053/ceo.2020.01732 (PMC8111393; doi:10.21053/ceo.2020.01732), 2020-09-25
Supplement: ceo-2020-01732-suppl2.pdf [file ceo-2020-01732-suppl2.pdf]

**Supplementary Table 2.** Recurrence patterns of stage IVa head and neck squamous cell carcinoma (n=1,033)

| Recurrence pattern     | Treatment modality |             |
|------------------------|--------------------|-------------|
|                        | Surgery (n=765)    | CRT (n=268) |
| Local-regional         | 163 (21.2)         | 94 (34.9)   |
| Local                  | 44 (5.7)           | 31 (11.5)   |
| Regional               | 88 (11.5)          | 36 (13.4)   |
| Local/regional         | 31 (4.0)           | 27 (10.0)   |
| Systemic               | 96 (12.4)          | 17 (6.2)    |
| Distant                | 90 (11.7)          | 16 (5.9)    |
| Local/regional/distant | 6 (0.7)            | 1 (0.3)     |
| Total                  | 259 (33.6)         | 111 (41.1)  |

Values are presented as number (%).

Surgery group, patients treated primarily by surgery with curative intent with/without (neo)adjuvant treatment; CRT group, patients treated primarily by chemotherapy and/or radiotherapy.
