# Supplementary material for: Survival Benefits From Surgery for Stage IVa Head and Neck Squamous Cell Carcinoma: A Multi-institutional Analysis of 1,033 Cases
Source: PubMed Central journal article supplement — Clin Exp Otorhinolaryngol. 2020 Sep 25;14(2):225–34. doi: 10.21053/ceo.2020.01732 (PMC8111393; doi:10.21053/ceo.2020.01732), 2020-09-25
Supplement: ceo-2020-01732-suppl3.pdf [file ceo-2020-01732-suppl3.pdf]

**Supplementary Table 3.** Multivariate analyses (Cox proportional hazard model) of the clinical parameters predicting the prognosis of patients with stage IVa oropharyngeal cancer (n=301)

| Variable      | Overall survival    |         | Disease-free survival |         |
|---------------|---------------------|---------|-----------------------|---------|
|               | OR (95% CI)         | P-value | OR (95% CI)           | P-value |
| Age ≥60 yr    | 1.745 (1.082–2.814) | 0.022*  | 1.519 (0.968–2.385)   | 0.069   |
| T4a stage     | 1.436 (0.869–2.374) | 0.158   | 1.876 (1.178–2.986)   | 0.008*  |
| Surgery group | 0.548 (0.341–0.879) | 0.013*  | 0.598 (0.377–0.948)   | 0.029*  |

OR, odds ratio; CI, confidence interval; Surgery group, patients treated primarily by surgery with curative intent with/without (neo)adjuvant treatment.

\*Statistically significant ( $P < 0.05$ ).
