# Supplementary material for: Survival Benefits From Surgery for Stage IVa Head and Neck Squamous Cell Carcinoma: A Multi-institutional Analysis of 1,033 Cases
Source: PubMed Central journal article supplement — Clin Exp Otorhinolaryngol. 2020 Sep 25;14(2):225–34. doi: 10.21053/ceo.2020.01732 (PMC8111393; doi:10.21053/ceo.2020.01732), 2020-09-25
Supplement: ceo-2020-01732-suppl7.pdf [file ceo-2020-01732-suppl7.pdf]

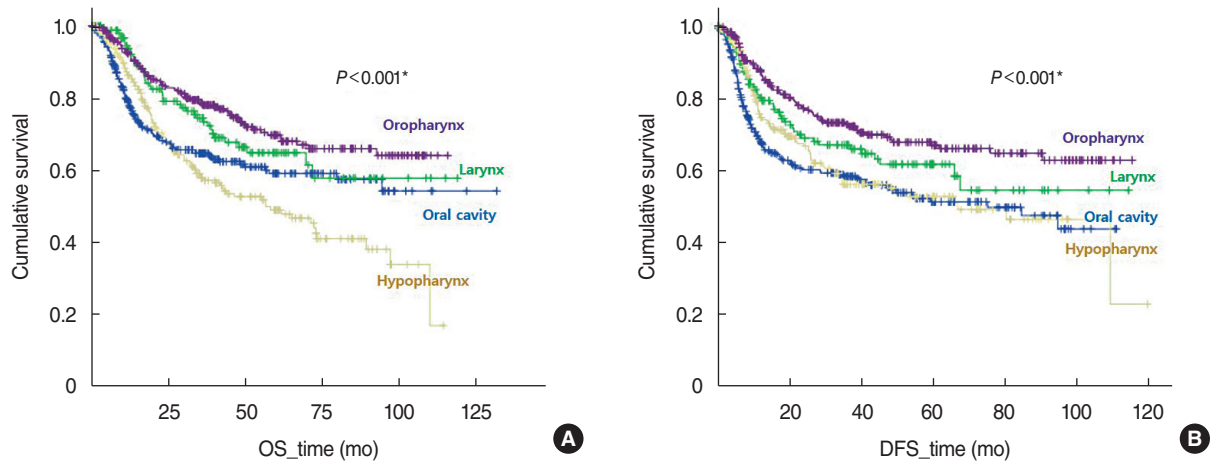

Supplementary Fig. 1. Kaplan-Meier survival curves of patients with stage IVa head and neck squamous cell carcinoma (n=1,033). (A) Overall survival (OS), (B) disease-free survival (DFS) by subsite. \*Statistically significant ( $P < 0.05$ ).
